# Supplementary material for: Identifying meteorological drivers of extreme impacts: an application to simulated crop yields
Source: Copernicus journal article supplement (doi:10.5194/esd-12-151-2021), 2021-02-10
Supplement: Supplementary file 1 [file esd-12-151-2021-supplement.zip]

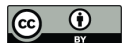

## *Supplement of*

# **Identifying meteorological drivers of extreme impacts: an application to simulated crop yields**

**Johannes Vogel et al.**

*Correspondence to:* Johannes Vogel ([joschavogel@uni-potsdam.de](mailto:joschavogel@uni-potsdam.de)),  
Pauline Rivoire ([pauline.rivoire@giub.unibe.ch](mailto:pauline.rivoire@giub.unibe.ch)), and Tianyi Zhang ([zhangty@post.iap.ac.cn](mailto:zhangty@post.iap.ac.cn))

- [esd-12-151-2021-supplement-title-page.pdf](#)
- [Pr\\_months.gif](#)
- [Tmax\\_months.gif](#)
- [VPD\\_months.gif](#)

The copyright of individual parts of the supplement might differ from the CC BY 4.0 License.
